# Supplementary material
Source: publisher figshare collection journal article supplement (https://frontiersin.figshare.com/ndownloader/files/17944094)
Supplement: Supplementary file [file 17944094]

## *Supplementary Material*

### **Understanding Events by Eye and Ear: Agent and Verb Drive**

#### **Non-Anticipatory Eye Movements in Dynamic Scenes**

**Roberto G. de Almeida<sup>1\*</sup>, Julia Di Nardo<sup>1</sup>, Caitlyn Antal<sup>1,2</sup>, Michael W. von Grünau<sup>1\*</sup>**

<sup>1</sup>Department of Psychology, Concordia University, Montreal, QC, Canada

<sup>2</sup>Department of Linguistics, Yale University, New Haven, CT, USA

**\* Correspondence:**

Roberto G. de Almeida

roberto.dealmeida@concordia.ca

#### **1 Scene Norms**

We conducted a scene norming study with two goals in mind: (1) we wanted to gather information about the predictability of the scenes—in particular with regards to the event to take place involving agent and target object—and (2) we wanted to quantify the saliency of the target object as a function of (a) each movement condition and (b) its “informativeness” (Henderson & Hollingworth, 1999) as part of a naturalistic scene. Previous studies on scene processing have found that more informative objects within a scene—defined as objects that are not usually taken to “belong” to that scene (such as in Loftus & Mackworth’s 1978 “octopus in a farm”/“tractor under water” case) draw more eye fixations during initial processing of the scene. Although Henderson, Weeks, and Hollingworth (1999) found no difference on first saccades to consistent and inconsistent objects in scenes, we wanted to determine the degree of salience of the target object to determine if there were differences across motion conditions.

In order to verify the predictability of the event as a function of different motion conditions, and to quantify the “informativeness” of target objects, we presented 34 Concordia University students with still frames of the movie triplets. The frames were selected from points in the movies where it appeared unambiguously that agents were about to perform a particular movement—e.g., to move away from a particular target object, or to move toward it, in the two critical cases—but without agents actually engaging objects or moving away from the scene (Figure 1, in the main text, represents one such triplet). These frames were distributed into three lists such that an equal number of away, toward and neutral conditions appeared in each list, but no slides representing the same scene appeared in each list. These slides were presented to each participant using Microsoft PowerPoint running automatically on a 17” Apple monitor. Each trial started with a fixation cross, followed by the presentation of the movie frame for 2 s. At the first 2 s of presentation of a still scene, Mackworth and Morandi (1967) found that informative regions receive most fixations. In Loftus and Mackworth’s (1978) study, participants viewed a scene for 4 s. We predicted that 2 s would be sufficient for the purpose of determining the nature of the scene/event together with some

of its constituent objects. This is also in keeping with the findings that the “gist” of a scene can be extracted in a very short amount of time even in the absence of eye movements, thus indicating that objects and possibly event concepts might be processed at the earliest moments of the viewing of the scene (e.g., Potter, 2018; Thorpe, Fize, & Marlot, 1996; VanRullen & Thorpe, 2001). After each slide was presented, participants had to perform two tasks. First, they were instructed (via a 3 s slide) to “list the objects in the scene” by writing down their answers in a booklet. They had 15 s to list up to six objects (as marked in the booklet). Second, after listing the objects, they were presented with a tone and another slide instructing them to write down a sentence about the scene. In version *A* of the response booklet, the message was “What is about to happen in the scene?” and in version *B* it was “What is happening in the scene?” Again, participants had 15 s to record their responses, with the beginning and end times indicated by the same two tones.

For the word listing part of the task, we computed the relative frequency of the target object as a function of movement condition. This was computed by calculating the number of times the object was listed over the total number of objects listed across participants (thus,  $1.0/6 = .167$  would be the maximum relative frequency, since 6 was the maximum number of objects to be listed). A repeated-measures ANOVA was computed with motion type as the independent variable. The analysis indicated that there was a main effect of motion type,  $F(2, 32) = 6.32, p < .01$ . A modified Bonferroni/Dunn test, with adjusted alpha levels of .03 per pairwise comparison, was conducted to determine which conditions differed from each other. These comparisons revealed that the away ( $M = .136, SD = .064$ ) and toward ( $M = .156, SD = .050$ ) conditions differed significantly ( $p = .02$ ), as did the neutral ( $M = .127, SD = .065$ ) and toward conditions ( $p < .01$ ). The away and neutral conditions were not significantly different ( $p = .31$ ). Notice that although the differences were significant, the magnitude of the relative frequencies shows that the target object received high attention across all conditions during the initial viewing of the still scenes.

For the sentence writing part of the task, we conducted two separate analyses. One for the *A* version of the booklet (*what is about to happen*) and another for the *B* version (*what is happening*). For both versions all sentences written by participants were coded as event structures, with predicate and arguments listed (e.g., [*break* [*the cook*, *eggs*]]). The relative frequency of predicates and arguments were computed for both *A* and *B* versions of the booklet. None of these analyses suggested that the events were predictable, as the range of target event matching the movies/scenes we created was 0-13.6% in the *A* version and 0-88.2% in the *B* version (with [*roll* [*child*, *cube*]] being the most predictable event). But there was no effect of motion condition in any of these versions of the booklet,  $F_A(2, 32) = 1.15, p = .33$ ;  $F_B(2, 28) < 1, p = .91$ .

The results from these scene norming tasks indicate that target object saliency or “informativeness” and scene/event gist are balanced across conditions. It should be noted that, although the relative frequency of the target object in the toward condition was higher than in the other two conditions, the still scenes were not taken from the frames used to synchronize the verb onsets with the motion onsets, but from a later frame. Also, the magnitudes of the frequencies were all high for the three conditions. In addition, the event that *is about to happen* and that *is happening*, according to participants in the *A* and *B* conditions, respectively, are not predictable from the brief 2 s inspections of the scenes. It seems that any effects of context on linguistic processing and any eye-movement directed by verb properties should be taken as effects of the unfolding linguistic and visual context in the dynamic scenes.

Table S1

*Target Object Listing Frequency*

| Target Object     | Away | Neutral | Toward | Overall |
|-------------------|------|---------|--------|---------|
| Ball              | .222 | .207    | .227   | .213    |
| Butter            | .038 | .097    | .074   | .071    |
| Car Crash         | .211 | .189    | .204   | .201    |
| Car Start         | .204 | .196    | .194   | .198    |
| Chair             | .138 | .150    | .170   | .152    |
| Cube <sub>a</sub> | .155 | .217    | .152   | .179    |
| Egg               | .021 | .037    | .106   | .054    |
| Ice               | .111 | .033    | .070   | .068    |
| Kite              | .073 | .038    | .088   | .067    |
| Milk <sub>b</sub> | .128 | .119    | .143   | .128    |
| Oven <sub>c</sub> | .070 | .042    | .125   | .084    |
| Paper             | .091 | .080    | .152   | .106    |
| Picture           | .190 | .157    | .188   | .178    |
| Plate             | .127 | .158    | .176   | .153    |
| Shirt             | .123 | .097    | .158   | .119    |
| Shoes             | .176 | .140    | .192   | .169    |
| Vase              | .227 | .200    | .231   | .221    |
| Mean              | .136 | .127    | .156   | .139    |

<sup>a</sup>These numbers were computed by counting two separately listed objects: “box/square toy” ( $F[A] = .017$ ,  $F[N] = .050$ ,  $F[T] = .000$ , and  $F[Overall] = .026$ ), which we took as referring to the cube, and “toy(s)” ( $F[A] = .138$ ,  $F[N] = .167$ ,  $F[T] = .152$ , and  $F[Overall] = .152$ ), which was included because a cube belongs to the “toy” category.

<sup>b</sup>These numbers were computed by totalling the frequencies listed for both “milk” ( $F[A] = .021$ ,  $F[N] = .000$ ,  $F[T] = .024$ , and  $F[Total] = .014$ ) and “cup” ( $F[A] = .106$ ,  $F[N] = .119$ ,  $F[T] = .119$ , and  $F[Overall] = .115$ ), which referred to the same object.

<sup>c</sup>These numbers were computed by totalling the frequencies listed for both “oven” ( $F[A] = .000$ ,  $F[N] = .021$ ,  $F[T] = .063$ , and  $F[Overall] = .032$ ) and “stove” ( $F[A] = .070$ ,  $F[N] = .021$ ,  $F[T] = .063$ , and  $F[Overall] = .052$ ), which referred to the same object and were listed separately by one subject, precluding the lumping together of the two synonyms.

Table S2

| <i>Human Agent Listing Frequency</i> |       |         |        |         |
|--------------------------------------|-------|---------|--------|---------|
| Scene                                | Away  | Neutral | Toward | Overall |
| Ball                                 | .222  | .207    | .182   | .200    |
| Butter                               | .173  | .161    | .167   | .167    |
| Car Crash                            | .123  | .170    | .184   | .157    |
| Car Start                            | .204  | .176    | .161   | .179    |
| Chair                                | .155  | .167    | .189   | .170    |
| Cube                                 | .190  | .250    | .152   | .205    |
| Egg                                  | .208  | .185    | .191   | .195    |
| Ice                                  | .222  | .183    | .233   | .209    |
| Kite                                 | .182  | .212    | .158   | .183    |
| Milk                                 | .213  | .186    | .214   | .203    |
| Oven                                 | .233  | .188    | .188   | .200    |
| Paper                                | .182  | .200    | .196   | .192    |
| Picture                              | .155  | .176    | .229   | .185    |
| Plate                                | .145  | .123    | .196   | .153    |
| Shirt                                | .158  | .161    | .158   | .153    |
| Shoes                                | .157  | .211    | .173   | .181    |
| Vase                                 | .227  | .250    | .192   | .221    |
| Mean                                 | 0.185 | 0.189   | 0.186  | 0.185   |

Table S3

*Target Event Propositional Structure Listing Frequency – Version “A” (“What will happen next?”)*

| Scene     | Away  | Neutral | Toward | Overall |
|-----------|-------|---------|--------|---------|
| Ball      | .000  | .000    | .000   | .000    |
| Butter    | .000  | .000    | .000   | .000    |
| Car Crash | .000  | .000    | .000   | .000    |
| Car Start | .000  | .000    | .000   | .000    |
| Chair     | .000  | .000    | .000   | .000    |
| Cube      | .000  | .000    | .000   | .000    |
| Egg       | .000  | .000    | .000   | .000    |
| Ice       | .000  | .000    | .500   | .150    |
| Kite      | .000  | .091    | .167   | .083    |
| Milk      | .000  | .000    | .000   | .000    |
| Oven      | .000  | .000    | .000   | .000    |
| Paper     | .000  | .000    | .000   | .000    |
| Picture   | .143  | .000    | .222   | .107    |
| Plate     | .333  | .000    | .000   | .136    |
| Shirt     | .000  | .000    | .000   | .000    |
| Shoes     | .000  | .000    | .000   | .000    |
| Vase      | .000  | .000    | .000   | .000    |
| Mean      | 0.028 | 0.005   | 0.052  | 0.028   |

Table S4

*Target Event Propositional Structure Listing Frequency – Version “B” (“What is happening now?”)*

| Scene     | Away  | Neutral | Toward | Overall |
|-----------|-------|---------|--------|---------|
| Ball      | .000  | .667    | .000   | 0.222   |
| Butter    | .429  | .167    | .500   | .333    |
| Car Crash | .091  | .100    | .000   | .077    |
| Car Start | .000  | .143    | .100   | .087    |
| Chair     | .400  | .167    | .125   | .211    |
| Cube      | 1.000 | 1.000   | .600   | .882    |
| Egg       | .333  | .286    | .500   | .368    |
| Ice       | .750  | .667    | .000   | .786    |
| Kite      | .333  | .000    | .125   | .167    |
| Milk      | .286  | .000    | .200   | .150    |
| Oven      | .400  | .167    | .200   | .238    |
| Picture   | .000  | .000    | .000   | .000    |
| Shirt     | .500  | .667    | .571   | .600    |
| Shoes     | .429  | .667    | .500   | .526    |
| Vase      | .800  | .667    | 1.000  | .824    |
| Mean      | 0.383 | 0.357   | 0.361  | 0.365   |

## **References**

Henderson J. M., & Hollingworth A. (1999). High-level scene perception. *Annual Review of Psychology*, 50, 243-271.

- Henderson J. M., Weeks P. A., & Hollingworth A. (1999). The effects of semantic consistency on eye movements during scene viewing. *Journal of Experimental Psychology: Human Perception and Performance*, 25, 210-228
- Loftus, G. R. & Mackworth, N. H. (1978). Cognitive determinants of fixation location during picture viewing. *Journal of Experimental Psychology: Human Perception and Performance*, 4, 565-572.
- Mackworth, N.H., & Morandi, A.J. (1967). The gaze selects informative details within pictures. *Perception & Psychophysics*, 2, 547–552.
- Potter, M. C. (2018). The immediacy of conceptual processing. In R. G. de Almeida & L. R. Gleitman (Eds.), *On concepts, modules, and language: Cognitive science at its core* (pp. 239-248). New York, NY: Oxford University Press.
- Thorpe, S. J., Fize, D. & Marlot, C. (1996) Speed of processing in the human visual system. *Nature*, 381, 520-522
- VanRullen, R. & Thorpe, S. J. (2001). Is it a bird? Is it a plane? Ultra-rapid visual categorization of natural and artifactual objects. *Perception*, 30, 655-668.
